# Supplementary material for: Delivering the pain: an overview of the type III secretion system with special consideration for aquatic pathogens
Source: Vet Res. 2021 Dec 19;52:146. doi: 10.1186/s13567-021-01015-8 (PMC8684695; doi:10.1186/s13567-021-01015-8)
Supplement: Supplementary file 1 — Additional file 1. Proteins belonging to the seven main T3SS families classified based on their homology. The table is reproduced with permission from Gazi et al. [181]. [file 13567_2021_1015_MOESM1_ESM.xlsx]

## Sheet: Sheet1
T3SS family	Unified nomenclature vs Species	SctV	SctW	SctN	SctO	SctP	SctQ	SctR	SctS	SctT	SctU	SctC	SctD	SctF	SctI	SctJ	SctK	SctL
Ysc	Yersinia sp.	LcrD	YopN	YscN	YscO	YscP	YscQ	YscR	YscS	YscT	YscU	YscC	YscD	YscF	YscI	YscJ	YscK	YscL
	Pseudomonas aeruginosa	PcrD	PopN	PscN	PscO	PscP	PscQ	PscR	PscS	PscT	PscU	PscC	PscD	PscF	PscI	PscJ	PscK	PscL
Inv-Mxi-Spa	Shigella flexneri	MxiA	Orf15MxiC	SpaL Spa47	SpaM Spa13	SpaN Spa32	SpaO Spa33	SpaP Spa24	SpaQ Spa9	SpaR Spa29	SpaU Spa40	MxiD	MxiG	MxiH	MxiI	MxiJ	MxiK	MxiN
	Salmonella enterica	InvA	InvE	InvC	InvI	InvJ	SpaO InvK	SpaP InvL	SpaQ	SpaR InvN	SpaS	InvG	PrgH	PrgI	PrgJ	PrgK	OrgA	OrgB
Ssa-Esc	Salmonella enterica	SsaV		SsaN	SsaO	SsaP	SsaQ	SsaR	SsaS	SsaT	SsaU	SpiA SsaC	SpiB SsaD	SsaG		SsaJ		SsaK
	EPEC	SepA	SepL	SepB	Orf15		SepQ	EscR	EscS	EscT	EscU	SepC		ORFD2	rOrf8	SepD		ORF5
Chlamydiales	Chlamydia trachomatis	CdsV	CopN	CdsN	CT670 CdsO	CT671 CdsP	CdsQ	CdsR	CdsS	CdsT	CdsU	CdsC	CdsD	CsdF		CdsJ		CdsL
Hrp-Hrc1	Pseudomonas syringae	HrcV	HrpJ	HrcN	HrpO	HrpP	HrcQA & HrcQB	HrcR	HrcS	HrcT	HrcU	HrcC	HrpQ	HrpA	HrpB	HrcJ	HrpD	HrpE
	Erwinia amylovora	HrcV	HrpJ	HrcN	HrpO	HrpP	HrcQ	HrcR	HrcS	HrcT	HrcU	HrcC	HrpQ	HrpA	HrpB	HrcJ		HrpE
Hrp-Hrc2	Burkcholderia pseudomallei	SctV		SctN	HrpD	HpaC	SctQ	SctR	SctS	SctT	SctU	SctC	SctD			SctJ		SctL
	Ralstonia solanacearum	HrcV		HrcN	HrpD	HpaP	HrcQ	HrcR	HrcS	HrcT	HrcU	HrcC	HrpW	HrpY	HrpJ	HrcJ		HrpF
	Xanthomonas campestris	HrcV	HpaA	HrcN	HrpB7	HpaP HpaC	HrcQ	HrcR	HrcS	HrcT	HrcU	HrcC	HrpD5	HrpE	HrpB2	HrcJ		HrcL
																		HrpB5
Rhc	Subgroup I Rhizobium pNGR234a	Y4yR	-	RhcN	Y4yJ	-	RhcQ	RhcR	RhcS	RhcT	RhcU	NolW RhcC1 & RhcC2	Y4yQ		NolU	NolT		NolV
	Subgroup II P. syringae	Hrc II V		Hrc II N	Hrc II O		Hrc II Q	Hrc II R	Hrc II S	Hrc II T	Hrc II U	Hrc II C1 Hrc II C2	Hrp II Q			Hrc II J		Hrp II E
	Subgroup II Rhizobium pNGR234b	Rhc II V	-		Rhc II O	-	Rhc II Q	Rhc II R	Rhc II S	Rhc II T	Rhc II U	Rhc II C1 & Rhc II C2	Rhp II Q					Rhc II L
	Subgroup III Rhizobium etli	RhcV	-	RhcN	RhcO	-	RhcQ	RhcR	RhcS	RhcT	RhcU	RhcC1			NolU	RhcJ		RhcL
Flagellar		FlhA		FliI	FliJ		FliY FliM & FliN	FliP	FliQ	FliR	FlhB		FliG			FliF		FliH
